# Supplementary material
Source: PubMed Central journal article supplement (PMC9251960)
Supplement: mmc1.pdf [file mmc1.pdf]

## Supplementary Information

### Methods

#### Cell culture infection assay

VeroE6/TMPRSS2 cells, a VeroE6 cell clone overexpressing the transmembrane protease, serine 2 (TMPRSS2), were cultured in Dulbecco's modified Eagle's medium (Life Technologies) supplemented with 10% fetal bovine serum (FBS) (Sigma), 100 units/mL penicillin, 100 µg/mL streptomycin, 10 mM HEPES (pH 7.4), and 1 mg/mL G418 (Nacalai) at 37°C in 5% CO<sub>2</sub> (Ohashi et al., 2021).

SARS-CoV-2 was investigated in a biosafety level 3 (BSL3) room. Through viral inoculation, we used WK-521 (Wuhan strain, EPI\_ISL\_408667), QK002 (Alpha, EPI\_ISL\_768526), TY7-501 (Gamma, EPI\_ISL\_833366), TY11-927 (Delta, EPI\_ISL\_2158617), TY38-873 (Omicron BA.1, EPI\_ISL\_7418017), and TY40-385 (Omicron BA.2, EPI\_ISL\_9595859) strains, isolated from COVID-19 patients and registered in GISAID. Viral infectious titers were measured by inoculating VeroE6/TMPRSS2 cells with a 10-fold serial dilution of the virus followed by measuring cytopathology to calculate TCID<sub>50</sub>/ml (Ohashi et al., 2021). Infection assay was conducted by inoculating VeroE6/TMPRSS2 cells with each SARS-CoV-2 strain at an MOI of 0.003 for 1 h, followed by washing out free viruses and culturing cells with fresh medium. A medium with 2% FBS without G418 was used during the infection assay. Antibodies and antiviral drugs were treated for 1 h during virus inoculation and 24 h after inoculation. At 24 h postinfection, the culture supernatant was recovered to isolate RNA using MagMax Viral/Pathogen Nucleic Acid Isolation kit (Thermo Fisher Scientific) and quantify SARS-CoV-2 RNA by real time RT-PCR with a one-step qRT-PCR kit (THUNDERBIRD Probe One-step qRT-PCR kit, TOYOBO) using 5'- ACAGGTACGTTAATAGTTAATAGCGT-3', 5'- ATATTGCAGCAGTACGCACACA-3', and 5'-FAM-ACACTAGCCATCCTTACTGCGCTTCG-TAMRA-3'. Simultaneously, cell viability was quantified by fixing the cells with 4% paraformaldehyde and staining with DAPI to count the number of cells using a high content imaging system ImageXpress (Molecular Devices).

#### Statistics

Statistical significance was determined by using Student's t test. P-values < 0.05 were considered significant. Where applicable, P-values are indicated as \*P < 0.05 or \*\*P < 0.01.

## Supplementary Figure

Fig. S1

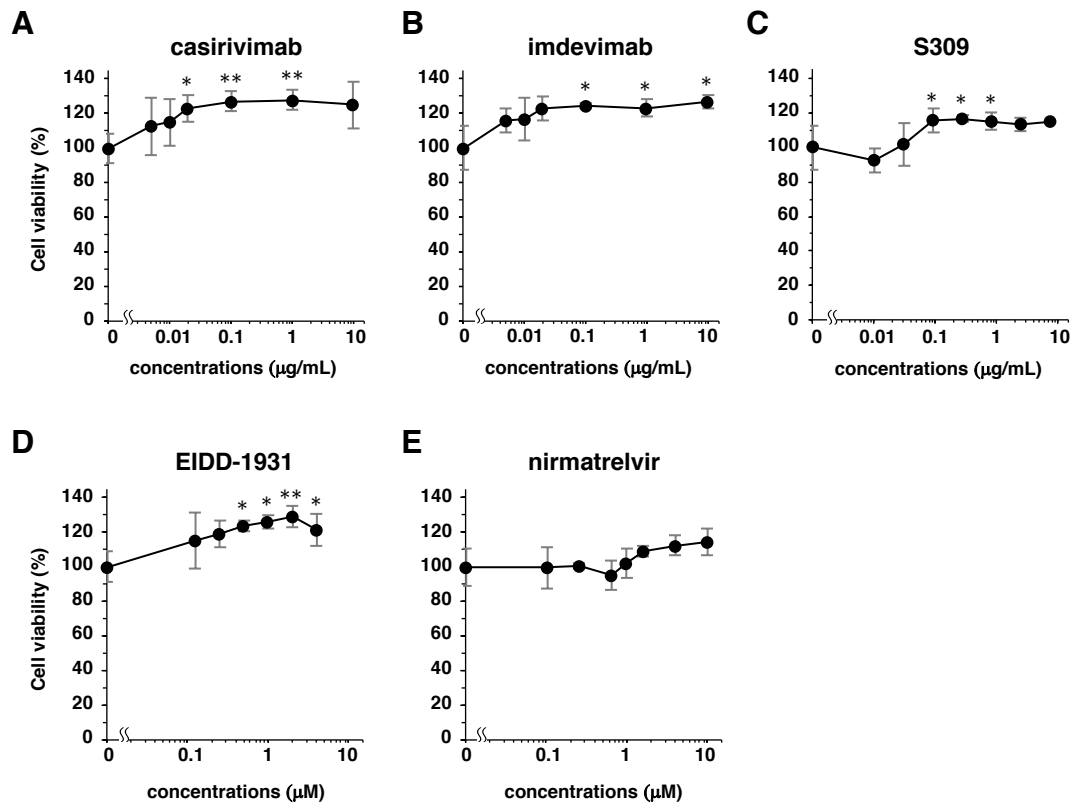

**Fig. S1. Cell viability upon treatment with neutralizing antibodies and antiviral drugs.** VeroE6/TMPRSS2 cells were inoculated with SARS-CoV-2 at an MOI of 0.003 in the presence of indicated antibodies or drugs at indicated concentrations for 1 h. The cells were then washed out and were cultured in a medium supplemented with the indicated concentrations of antibodies or drugs. After 24 h, cells were subsequently fixed with 4% paraformaldehyde and stained with DAPI, followed by counting using a high content imaging system ImageXpress Micro Confocal (Molecular Devices) to quantify cell viability. Data are presented as mean  $\pm$  SD across the three replicate experiments. Relative values are shown as percentages of cell viability to the control cells that were incubated without antibodies/drugs. Statistical significance was determined by using Student's t test (\* $p < 0.05$ , \*\* $p < 0.01$ ).

**Fig. S2**  
**casirivimab**

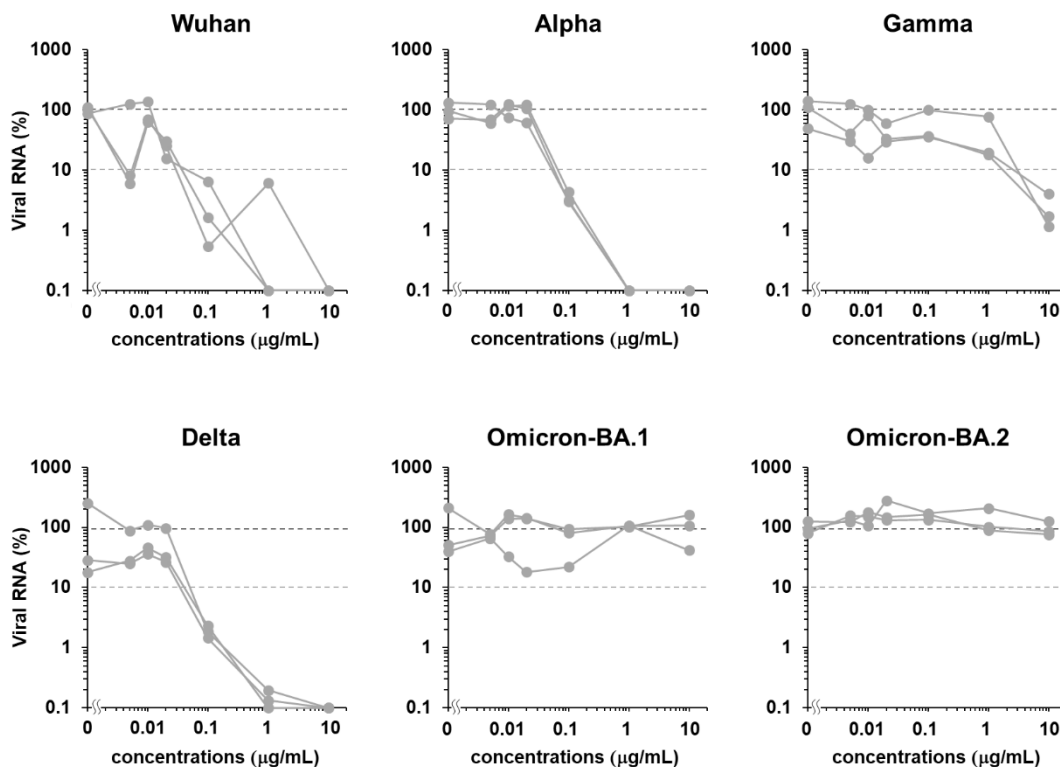

**Figure. S2. Dose-response curves of casirivimab for SARS-CoV-2 variants (Wuhan, alpha, gamma, delta, omicron BA.1, and omicron BA.2).** Secreted viral RNA into the supernatant from infected VeroE6/TMPRSS2 cells at 24 hours after virus inoculation was quantified and plotted in gray against drug concentration. Values less than 0.1% are shown as 0.1% in these graphs.

**Fig. S3**

**imdevimab**

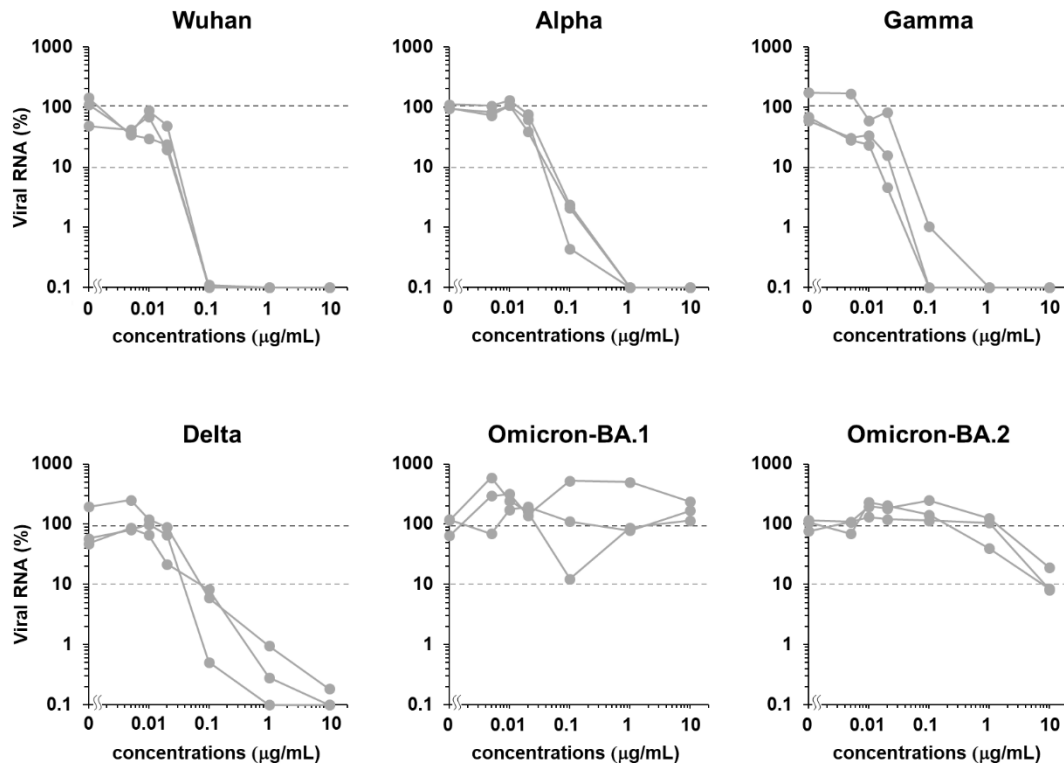

**Figure. S3. Dose-response curves of imdevimab for SARS-CoV-2 variants (Wuhan, alpha, gamma, delta, omicron BA.1, and omicron BA.2).** Secreted viral RNA into the supernatant from infected VeroE6/TMPRSS2 cells at 24 hours after virus inoculation was quantified and plotted in gray against drug concentration. Values less than 0.1% are shown as 0.1% in these graphs.

**Fig. S4**  
**S309**

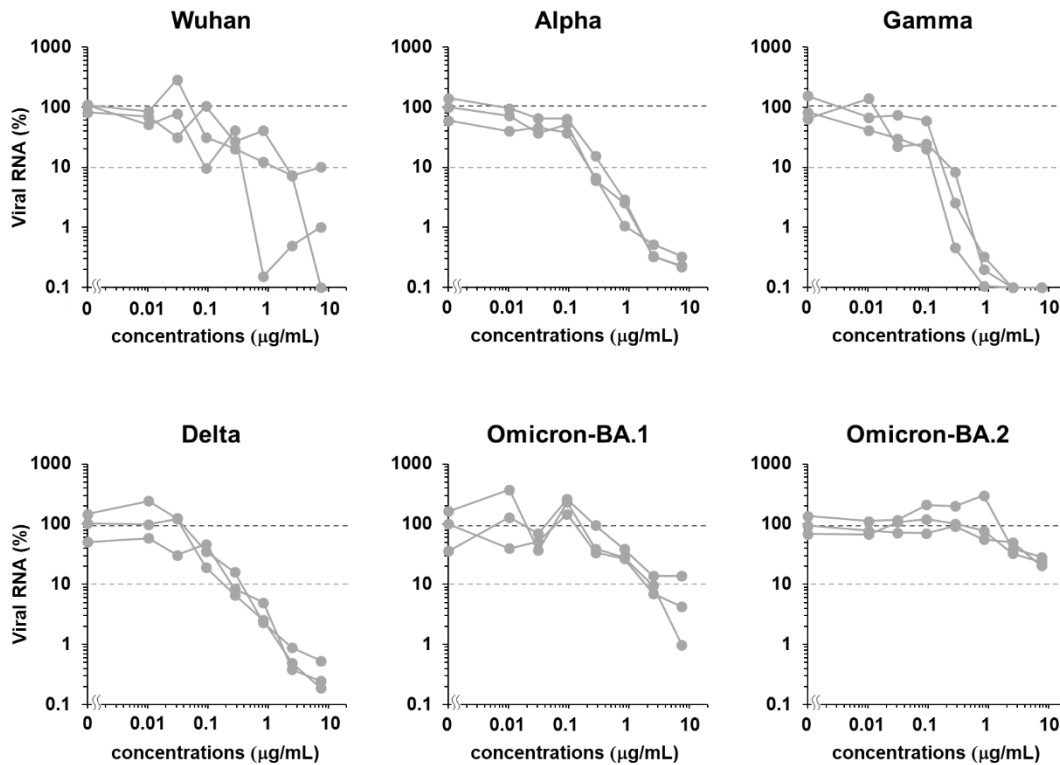

**Figure. S4. Dose-response curves of S309 for SARS-CoV-2 variants (Wuhan, alpha, gamma, delta, omicron BA.1, and omicron BA.2).** Secreted viral RNA into the supernatant from infected VeroE6/TMPRSS2 cells at 24 hours after virus inoculation was quantified and plotted in gray against drug concentration. Values less than 0.1% are shown as 0.1% in these graphs.

**Fig. S5**

**EIDD-1931**

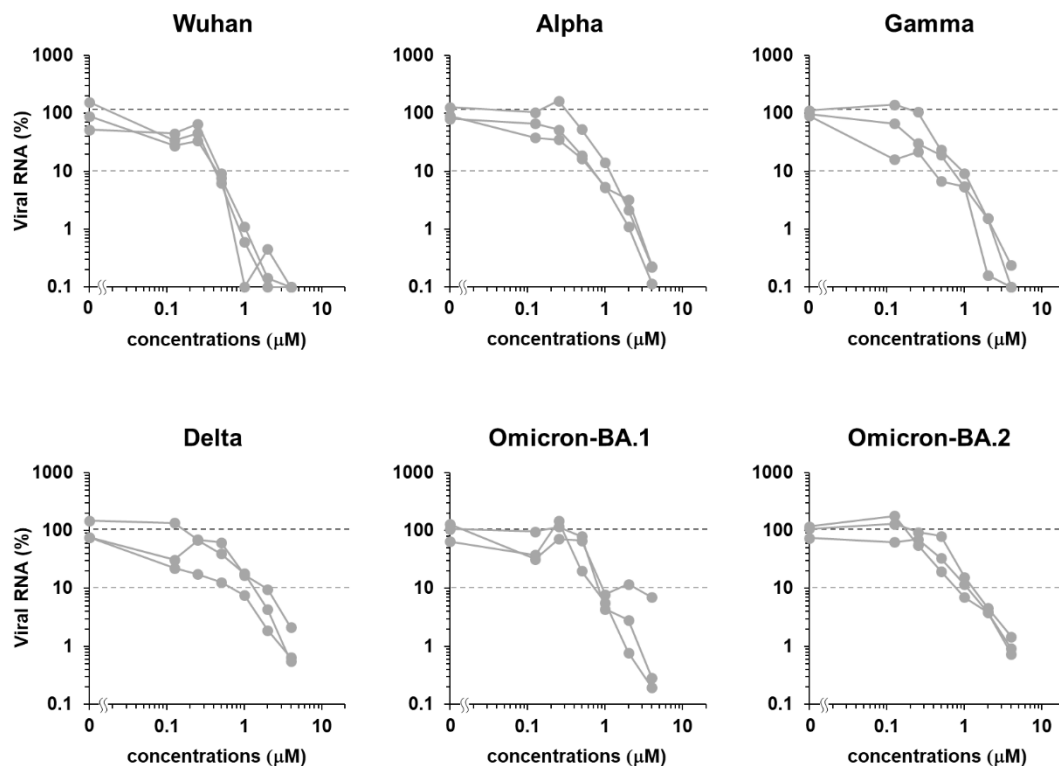

**Figure. S5. Dose-response curves of EIDD-1931 for SARS-CoV-2 variants (Wuhan, alpha, gamma, delta, omicron BA.1, and omicron BA.2).** Secreted viral RNA into the supernatant from infected VeroE6/TMPRSS2 cells at 24 hours after virus inoculation was quantified and plotted in gray against drug concentration. Values less than 0.1% are shown as 0.1% in these graphs.

**Fig. S6**  
**nirmatrelvir**

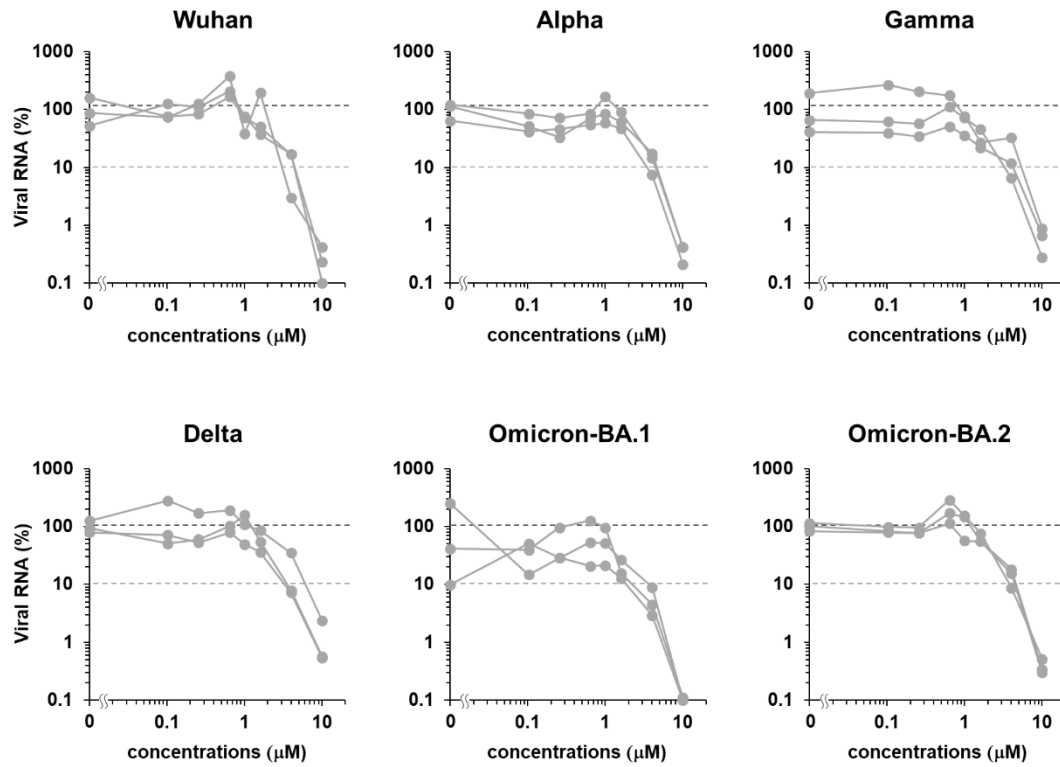

**Figure. S6. Dose-response curves of nirmatrelvir for SARS-CoV-2 variants (Wuhan, alpha, gamma, delta, omicron BA.1, and omicron BA.2).** Secreted viral RNA into the supernatant from infected VeroE6/TMPRSS2 cells at 24 hours after virus inoculation was quantified and plotted in gray against drug concentration. Values less than 0.1% are shown as 0.1% in these graphs.

## Supplementary Table

**Table. S1. Drug concentrations in patients**

| <b>Drug</b>         | <b><math>C_{max}</math> (unit)</b> | <b>AUC (unit)</b>                                          | <b>Molecular mass (unit)</b> |
|---------------------|------------------------------------|------------------------------------------------------------|------------------------------|
| <b>casirivimab</b>  | 192 ( $\mu\text{g}/\text{mL}$ )    | 2580 ( $\text{day}^*\mu\text{g}/\text{mL}$ ) <sup>*1</sup> | 145230 (g/mol)               |
| <b>imdevimab</b>    | 198 ( $\mu\text{g}/\text{mL}$ )    | 1990 ( $\text{day}^*\mu\text{g}/\text{mL}$ ) <sup>*1</sup> | 144140 (g/mol)               |
| <b>S309</b>         | 143 ( $\mu\text{g}/\text{mL}$ )    | 1410 ( $\text{day}^*\mu\text{g}/\text{mL}$ ) <sup>*2</sup> | 149000 (g/mol)               |
| <b>EIDD-1931</b>    | 2.97 ( $\mu\text{g}/\text{mL}$ )   | 602.0 ( $\text{day}^*\mu\text{M}$ ) <sup>*3</sup>          | 329.31 (g/mol)               |
| <b>nirmatrelvir</b> | 2.21 ( $\mu\text{g}/\text{mL}$ )   | 1105 ( $\text{day}^*\mu\text{M}$ ) <sup>*4</sup>           | 499.54 (g/mol)               |

\*1 AUC<sub>inf</sub>, 600 mg subcutaneous injection

\*2 AUC<sub>D1-29</sub>, sotrovimab 500 mg intravenous infusion

\*3 AUC<sub>0-12h</sub>, 800 mg oral administration in patients

\*4 AUC<sub>inf</sub>, 300 mg with ritonavir (100 mg) oral administration in healthy subjects

The pharmacokinetics of these antibodies/drugs are available in reference articles (2-5).

## References

1. Ohashi, H., Watashi, K., Saso, W., Shionoya, K., Iwanami, S., Hirokawa, T., Shirai, T., Kanaya, S., Ito, Y., Kim, K.S., et al. (2021). Potential anti-COVID-19 agents, cepharanthine and nelfinavir, and their usage for combination treatment. *iScience* 24, 102367. doi: 10.1016/j.isci.2021.102367
2. Food and Drug Administration (2021) Fact Sheet for Health Care Providers Emergency Use Authorization (EUA) of REGEN-COV (casirivimab and imdevimab). <https://www.fda.gov/media/145611/download>
3. Food and Drug Administration (2022) Fact Sheet for Health Care Providers Emergency Use Authorization (EUA) of Sotrovimab. <https://www.fda.gov/media/149534/download>
4. Food and Drug Administration (2022) Fact Sheet for Health Care Providers Emergency Use Authorization (EUA) of Molnupiravir. <https://www.fda.gov/media/155054/download>
5. Food and Drug Administration (2021) Fact Sheet for Health Care Providers Emergency Use Authorization (EUA) of Paxlovid. <https://www.fda.gov/media/155050/download>
